# Supplementary material for: Hospitalizations and cardiac sarcoidosis: insights into presentation and diagnosis from the nationwide readmission database
Source: Frontiers journal article supplement (doi:10.3389/fcvm.2024.1475181), 2024-11-19
Supplement: Data_Sheet_1.pdf [file Data_Sheet_1.pdf]

# Hospitalizations and Cardiac Sarcoidosis: Insights into Presentation and Diagnosis from the Nationwide Readmission Database

Jacob Abraham<sup>1\*</sup>, Kateri Spinelli<sup>1</sup>, Hsin-Fang Li<sup>1</sup>, Tuan Pham<sup>2</sup>, Mansen Wang<sup>1</sup> and Farooq H. Sheikh<sup>3</sup>

<sup>1</sup>Center for Cardiovascular Analytics, Research and Data Science (CARDS), Providence Heart Institute, Providence Research Network, Portland, Oregon, <sup>2</sup>Adventist Health, Portland, Oregon, <sup>3</sup>Advanced Heart Failure Program, MedStar Washington Hospital Center, Georgetown University School of Medicine, Washington, DC

## **SUPPLEMENTARY TABLES & FIGURES**

Supplementary Table S1: Additional Comorbidities

| Variable                                                                     | CS+<br>(N=1,146) | CS-<br>(N=3,250,696) |
|------------------------------------------------------------------------------|------------------|----------------------|
| Additional comorbidities                                                     |                  |                      |
| Acquired immune deficiency syndrome                                          | 2 (0.2%)         | 10667 (0.3%)         |
| Alcohol abuse                                                                | 38 (3%)          | 128545 (4%)          |
| Arthropathies                                                                | 42 (4%)          | 116146 (4%)          |
| Lymphoma                                                                     | 8 (1%)           | 30725 (1%)           |
| Leukemia                                                                     | 5 (0.4%)         | 22741 (1%)           |
| Metastatic cancer                                                            | 1 (0.1%)         | 41641 (1%)           |
| Solid tumor without metastasis, in situ                                      | 0 (0%)           | 775 (0.02%)          |
| Solid tumor without metastasis, malignant                                    | 13 (1%)          | 81302 (3%)           |
| Congestive heart failure                                                     | 24 (2%)          | 5423 (0.2%)          |
| Dementia                                                                     | 4 (0.4%)         | 253764 (8%)          |
| Depression                                                                   | 103 (9%)         | 343204 (11%)         |
| Drug abuse                                                                   | 17 (2%)          | 93312 (3%)           |
| Liver disease, moderate to severe                                            | 1 (0.1%)         | 3844 (0.1%)          |
| Paralysis                                                                    | 10 (1%)          | 61213 (2%)           |
| Hypothyroidism                                                               | 151 (13%)        | 573905 (18%)         |
| Other thyroid disorders                                                      | 43 (4%)          | 57652 (2%)           |
| Weight loss                                                                  | 0 (0%)           | 2 (0%)               |
| APR-DRG risk of mortality                                                    |                  |                      |
| Minor likelihood of dying                                                    | 169 (15%)        | 565389 (17%)         |
| Moderate likelihood of dying                                                 | 336 (29%)        | 1043888 (32%)        |
| Major likelihood of dying                                                    | 486 (42%)        | 1185370 (36%)        |
| Extreme likelihood of dying                                                  | 155 (13%)        | 455937 (14%)         |
| APR-DRG severity of illness                                                  |                  |                      |
| Minor loss of function (includes cases with no comorbidity or complications) | 192 (17%)        | 431075 (13%)         |
| Moderate loss of function                                                    | 444 (39%)        | 1180705 (36%)        |
| Major loss of function                                                       | 370 (32%)        | 1237198 (38%)        |
| Extreme loss of function                                                     | 140 (12%)        | 401606 (12%)         |

Abbreviations: CS = Cardiac sarcoidosis, APR-DRG = All Patients Refined Diagnosis Related Groups  
Data presented as n (%) unless otherwise noted.

Supplementary Figure S1: Standardized Mean Difference Plot. The CS- unmatched population is shown in blue and the CS- population after propensity score matching is shown in red. The two dashed lines represent the recommended limits of -0.25 and 0.25 for the standardized mean differences.

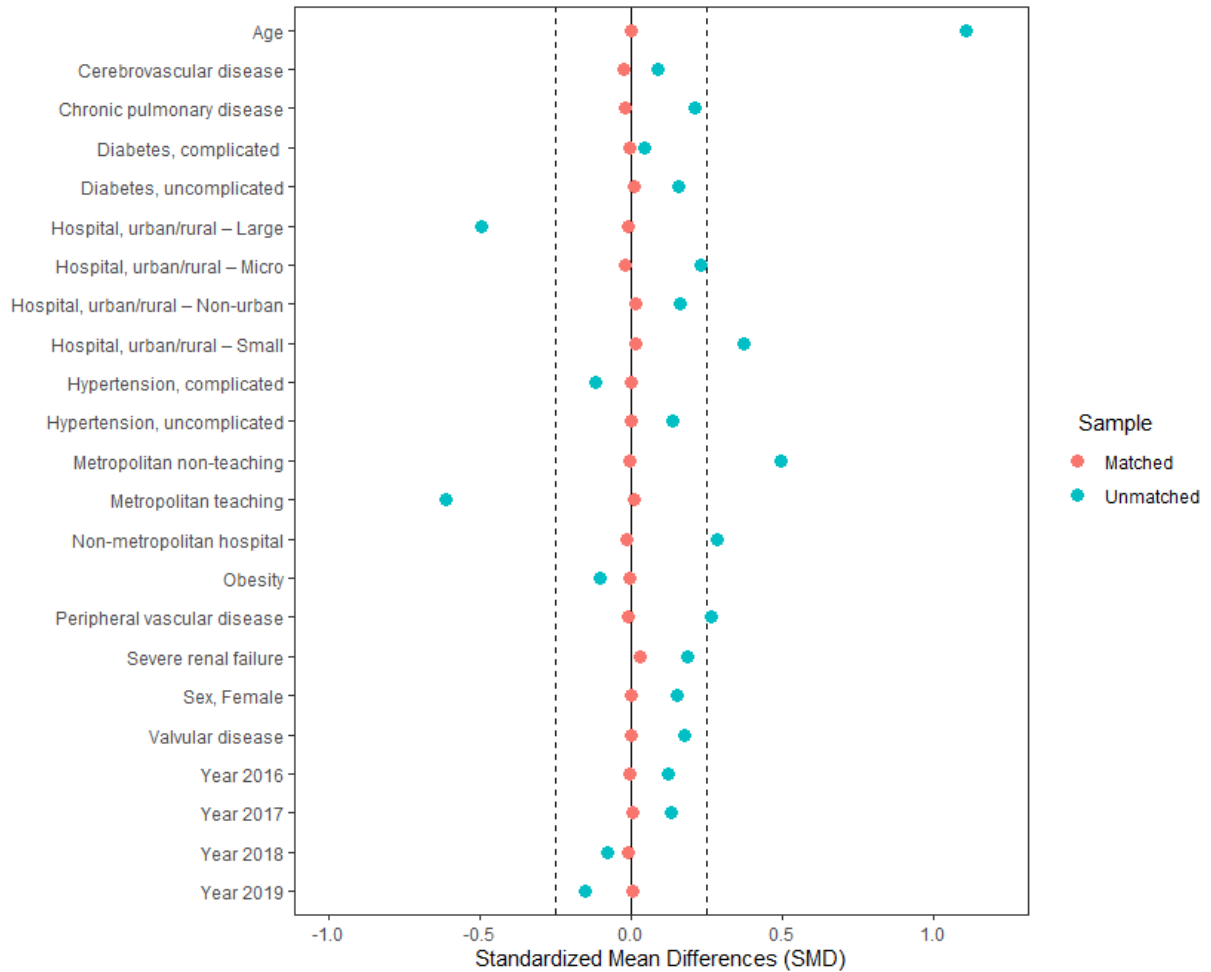

**Supplementary Figure S2: Index Event Mortality (A) and 30-day Readmission (B) Over Time.**  
CS = cardiac sarcoidosis.

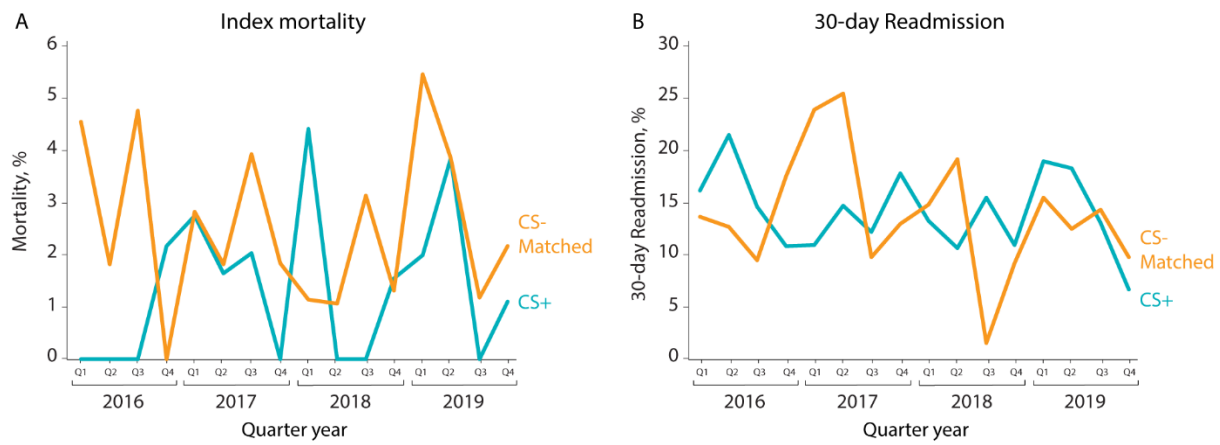

Supplementary Table S2: ICD-10 Codes

| Element and Code Description                                                                                                                               | Code    |
|------------------------------------------------------------------------------------------------------------------------------------------------------------|---------|
| Cardiac Sarcoidosis                                                                                                                                        |         |
| Sarcoid myocarditis (cardiac sarcoidosis)                                                                                                                  | D86.85  |
| Heart Failure                                                                                                                                              |         |
| Hypertensive heart disease with heart failure                                                                                                              | I11.0   |
| Hypertensive heart and chronic kidney disease with heart failure and stage 1 through stage 4 chronic kidney disease, or unspecified chronic kidney disease | I13.0   |
| Hypertensive heart and chronic kidney disease with heart failure and stage 5 chronic kidney disease, or end stage renal disease                            | I13.2   |
| Heart failure                                                                                                                                              | I50     |
| Left ventricular failure, unspecified                                                                                                                      | I50.1   |
| Unspecified systolic (congestive) heart failure                                                                                                            | I50.20  |
| Acute systolic (congestive) heart failure                                                                                                                  | I50.21  |
| Chronic systolic (congestive) heart failure                                                                                                                | I50.22  |
| Acute on chronic systolic (congestive) heart failure                                                                                                       | I50.23  |
| Unspecified diastolic (congestive) heart failure                                                                                                           | I50.30  |
| Acute diastolic (congestive) heart failure                                                                                                                 | I50.31  |
| Chronic diastolic (congestive) heart failure                                                                                                               | I50.32  |
| Acute on chronic diastolic (congestive) heart failure                                                                                                      | I50.33  |
| Unspecified combined systolic (congestive) and diastolic (congestive) heart failure                                                                        | I50.40  |
| Acute combined systolic (congestive) and diastolic (congestive) heart failure                                                                              | I50.41  |
| Chronic combined systolic (congestive) and diastolic (congestive) heart failure                                                                            | I50.42  |
| Acute on chronic combined systolic (congestive) and diastolic (congestive) heart failure                                                                   | I50.43  |
| Right heart failure, unspecified                                                                                                                           | I50.810 |
| Acute right heart failure                                                                                                                                  | I50.811 |
| Chronic right heart failure                                                                                                                                | I50.812 |
| Acute on chronic right heart failure                                                                                                                       | I50.813 |
| Right heart failure due to left heart failure                                                                                                              | I50.814 |
| Biventricular heart failure                                                                                                                                | I50.82  |
| End stage heart failure                                                                                                                                    | I50.84  |
| Other heart failure                                                                                                                                        | I50.89  |
| Heart failure, unspecified                                                                                                                                 | I50.9   |
| Cardiac Arrest                                                                                                                                             |         |
| Cardiac arrest due to an underlying cardiac condition                                                                                                      | I46.2   |

| <b>Element and Code Description</b>              | <b>Code</b> |
|--------------------------------------------------|-------------|
| Cardiac arrest due to other underlying condition | I46.8       |
| Cardiac arrest, cause unspecified                | I46.9       |
| <hr/>                                            |             |
| Heart Failure/Cardiomyopathy                     |             |
| Other cardiomyopathies                           | I42.8       |
| Cardiomyopathy, unspecified                      | I42.9       |
| Dilated cardiomyopathy                           | I42.0       |
| Other hypertrophic cardiomyopathy                | I42.2       |
| Other restrictive cardiomyopathy                 | I42.5       |
| Cardiomyopathy in diseases classified elsewhere  | I43         |
| <hr/>                                            |             |
| General arrhythmia                               |             |
| Unspecified premature depolarization             | I49.40      |
| Other premature depolarization                   | I49.49      |
| Other specified cardiac arrhythmias              | I49.8       |
| Cardiac arrhythmia, unspecified                  | I49.9       |
| Paroxysmal tachycardia                           | I47         |
| <hr/>                                            |             |
| Ventricular arrhythmia                           |             |
| Ventricular tachycardia                          | I47.2       |
| Paroxysmal tachycardia, unspecified              | I47.9       |
| Tachycardia, unspecified                         | R000        |
| Re-entry ventricular arrhythmia                  | I47.0       |
| Ventricular tachycardia                          | I47.2       |
| Paroxysmal tachycardia, unspecified              | I47.9       |
| Ventricular fibrillation                         | I49.01      |
| Ventricular flutter                              | I49.02      |
| Ventricular premature depolarization             | I49.3       |
| <hr/>                                            |             |
| Supraventricular arrhythmia                      |             |
| Supraventricular tachycardia                     | I47.1       |
| Paroxysmal atrial fibrillation                   | I48.0       |
| Persistent atrial fibrillation                   | I48.1       |
| Chronic atrial fibrillation                      | I48.2       |
| Typical atrial flutter                           | I48.3       |
| Atypical atrial flutter                          | I48.4       |
| Unspecified atrial fibrillation                  | I48.91      |
| Unspecified atrial flutter                       | I48.92      |

| <b>Element and Code Description</b>                                                                                                     | <b>Code</b> |
|-----------------------------------------------------------------------------------------------------------------------------------------|-------------|
| <b>Heart Block</b>                                                                                                                      |             |
| Atrioventricular block, first degree                                                                                                    | I44.0       |
| Atrioventricular block, second degree                                                                                                   | I44.1       |
| Atrioventricular block, complete                                                                                                        | I44.2       |
| Unspecified atrioventricular block                                                                                                      | I44.30      |
| Other atrioventricular block                                                                                                            | I44.39      |
| Left anterior fascicular block                                                                                                          | I44.4       |
| Left posterior fascicular block                                                                                                         | I44.5       |
| Unspecified fascicular block                                                                                                            | I44.60      |
| Other fascicular block                                                                                                                  | I44.69      |
| Left-bundle-branch block, unspecified                                                                                                   | I44.7       |
| Right fascicular block                                                                                                                  | I45.0       |
| Unspecified right bundle-branch block                                                                                                   | I45.10      |
| Other right bundle-branch block                                                                                                         | I45.19      |
| Bifascicular block                                                                                                                      | I45.2       |
| Trifascicular block                                                                                                                     | I45.3       |
| Nonspecific intraventricular block                                                                                                      | I45.4       |
| Other specified heart block                                                                                                             | I45.5       |
| <b>Pacemaker Defibrillator Procedures</b>                                                                                               |             |
| Insertion of Cardiac Resynchronization Pacemaker Pulse Generator into Abdomen Subcutaneous Tissue and Fascia, Percutaneous Approach     | 0JH837Z     |
| Insertion of Defibrillator Generator into Abdomen Subcutaneous Tissue and Fascia, Percutaneous Approach                                 | 0JH838Z     |
| Insertion of Cardiac Resynchronization Defibrillator Pulse Generator into Abdomen Subcutaneous Tissue and Fascia, Percutaneous Approach | 0JH839Z     |
| Insertion of Cardiac Rhythm Related Device into Abdomen Subcutaneous Tissue and Fascia, Percutaneous Approach                           | 0JH83PZ     |
| <b>Ventricular Assist Device (VAD) Procedures</b>                                                                                       |             |
| Insertion of Implantable Heart Assist System into Heart, Open Approach                                                                  | 02HA0QZ     |
| Insertion of Implantable Heart Assist System into Heart, Percutaneous Approach                                                          | 02HA3QZ     |
| Insertion of Implantable Heart Assist System into Heart, Percutaneous Endoscopic Approach                                               | 02HA4QZ     |
| Assistance with Cardiac Output using Pulsatile Compression, Intermittent                                                                | 5A02115     |
| Assistance with Cardiac Output using Other Pump, Intermittent                                                                           | 5A02116     |
| Assistance with Cardiac Output using Impeller Pump, Intermittent                                                                        | 5A0211D     |

| <b>Element and Code Description</b>                                                                               | <b>Code</b> |
|-------------------------------------------------------------------------------------------------------------------|-------------|
| Assistance with Cardiac Output using Pulsatile Compression, Continuous                                            | 5A02215     |
| Assistance with Cardiac Output using Other Pump, Continuous                                                       | 5A02216     |
| Assistance with Cardiac Output using Impeller Pump, Continuous                                                    | 5A0221D     |
| <b>Temporary Mechanical Cardiac Support (tMCS) Procedures</b>                                                     |             |
| Insertion of Short-term External Heart Assist System into Heart, Intraoperative, Open Approach                    | 02HA0RJ     |
| Insertion of Biventricular Short-term External Heart Assist System into Heart, Open Approach                      | 02HA0RS     |
| Insertion of Short-term External Heart Assist System into Heart, Open Approach                                    | 02HA0RZ     |
| Insertion of Short-term External Heart Assist System into Heart, Intraoperative, Percutaneous Approach            | 02HA3RJ     |
| Insertion of Biventricular Short-term External Heart Assist System into Heart, Percutaneous Approach              | 02HA3RS     |
| Insertion of Short-term External Heart Assist System into Heart, Percutaneous Approach                            | 02HA3RZ     |
| Insertion of Short-term External Heart Assist System into Heart, Intraoperative, Percutaneous Endoscopic Approach | 02HA4RJ     |
| Insertion of Biventricular Short-term External Heart Assist System into Heart, Percutaneous Endoscopic Approach   | 02HA4RS     |
| Insertion of Short-term External Heart Assist System into Heart, Percutaneous Endoscopic Approach                 | 02HA4RZ     |
| Assistance with Cardiac Output using Balloon Pump, Intermittent                                                   | 5A02110     |
| Assistance with Cardiac Output using Balloon Pump, Continuous                                                     | 5A0221D     |
| <b>Extracorporeal Membrane Oxygenation (ECMO) Procedures</b>                                                      |             |
| Extracorporeal Supersaturated Oxygenation, Intermittent                                                           | 5A0512C     |
| Extracorporeal Supersaturated Oxygenation, Continuous                                                             | 5A0522C     |
| Extracorporeal Membrane Oxygenation, Continuous                                                                   | 5A15223     |
| Extracorporeal Oxygenation, Membrane, Central                                                                     | 5A1522F     |
| Extracorporeal Oxygenation, Membrane, Peripheral Veno-arterial                                                    | 5A1522G     |
| Extracorporeal Oxygenation, Membrane, Peripheral Veno-venous                                                      | 5A1522H     |
| <b>Transplant Procedures</b>                                                                                      |             |
| Transplantation of Heart, Allogeneic, Open Approach                                                               | 02YA0Z0     |
| <b>Fluorine 18 Positron Emission Tomography</b>                                                                   |             |
| Positron Emission Tomographic (PET) Imaging of Myocardium using Fluorine 18                                       | C23GK       |
| Positron Emission Tomographic (PET) Imaging of Myocardium using Fluorine 18                                       | C23GKZ      |
| Positron Emission Tomographic (PET) Imaging of Myocardium using Fluorine 18                                       | C23GKZZ     |



| <b>Element and Code Description</b>                                                                     | <b>Code</b> |
|---------------------------------------------------------------------------------------------------------|-------------|
| Cardiac Magnetic Resonance Imaging                                                                      |             |
| Magnetic Resonance Imaging (MRI) of Right and Left Heart                                                | B236        |
| Magnetic Resonance Imaging (MRI) of Right and Left Heart, Other Contrast                                | B236Y       |
| Magnetic Resonance Imaging (MRI) of Right and Left Heart, Other Contrast, Unenhanced and Enhanced       | B236Y0      |
| Magnetic Resonance Imaging (MRI) of Right and Left Heart using Other Contrast, Unenhanced and Enhanced  | B236Y0Z     |
| Magnetic Resonance Imaging (MRI) of Right and Left Heart using Other Contrast                           | B236YZ      |
| Magnetic Resonance Imaging (MRI) of Right and Left Heart using Other Contrast                           | B236YZZ     |
| Magnetic Resonance Imaging (MRI) of Right and Left Heart                                                | B236Z       |
| Magnetic Resonance Imaging (MRI) of Right and Left Heart                                                | B236ZZ      |
| Magnetic Resonance Imaging (MRI) of Right and Left Heart                                                | B236ZZZ     |
| Right Heart Catheterization (RHC) Procedures                                                            |             |
| Measurement of Cardiac Sampling and Pressure, Right Heart, Open Approach                                | 4A020N6     |
| Measurement of Cardiac Sampling and Pressure, Bilateral, Open Approach                                  | 4A020N8     |
| Measurement of Cardiac Sampling and Pressure, Right Heart, Percutaneous Approach                        | 4A023N6     |
| Measurement of Cardiac Sampling and Pressure, Bilateral, Percutaneous Approach                          | 4A023N8     |
| Measurement of Cardiac Sampling and Pressure, Right Heart, Via Natural or Artificial Opening            | 4A027N6     |
| Measurement of Cardiac Sampling and Pressure, Bilateral, Via Natural or Artificial Opening              | 4A027N8     |
| Measurement of Cardiac Sampling and Pressure, Right Heart, Via Natural or Artificial Opening Endoscopic | 4A028N6     |
| Measurement of Cardiac Sampling and Pressure, Bilateral, Via Natural or Artificial Opening Endoscopic   | 4A028N8     |
| Coronary Angiography Procedures                                                                         |             |
| Plain Radiography of Single Coronary Artery using High Osmolar Contrast                                 | B2000ZZ     |
| Plain Radiography of Single Coronary Artery using Low Osmolar Contrast                                  | B2001ZZ     |
| Plain Radiography of Single Coronary Artery using Other Contrast                                        | B200YZZ     |
| Plain Radiography of Multiple Coronary Arteries using High Osmolar Contrast                             | B2010ZZ     |
| Plain Radiography of Multiple Coronary Arteries using Low Osmolar Contrast                              | B2011ZZ     |
| Plain Radiography of Multiple Coronary Arteries using Other Contrast                                    | B201YZZ     |
| Plain Radiography of Single Coronary Artery Bypass Graft using High Osmolar Contrast                    | B2020ZZ     |
| Plain Radiography of Single Coronary Artery Bypass Graft using Low Osmolar Contrast                     | B2021ZZ     |

| <b>Element and Code Description</b>                                                         | <b>Code</b> |
|---------------------------------------------------------------------------------------------|-------------|
| Plain Radiography of Single Coronary Artery Bypass Graft using Other Contrast               | B202YZZ     |
| Plain Radiography of Multiple Coronary Artery Bypass Grafts using High Osmolar Contrast     | B2030ZZ     |
| Plain Radiography of Multiple Coronary Artery Bypass Grafts using Low Osmolar Contrast      | B2031ZZ     |
| Plain Radiography of Multiple Coronary Artery Bypass Grafts using Other Contrast            | B203YZZ     |
| Plain Radiography of Right Internal Mammary Bypass Graft using High Osmolar Contrast        | B2070ZZ     |
| Plain Radiography of Right Internal Mammary Bypass Graft using Low Osmolar Contrast         | B2071ZZ     |
| Plain Radiography of Right Internal Mammary Bypass Graft using Other Contrast               | B207YZZ     |
| Plain Radiography of Left Internal Mammary Bypass Graft using High Osmolar Contrast         | B2080ZZ     |
| Plain Radiography of Left Internal Mammary Bypass Graft using Low Osmolar Contrast          | B2081ZZ     |
| Plain Radiography of Left Internal Mammary Bypass Graft using Other Contrast                | B208YZZ     |
| Plain Radiography of Other Bypass Graft using High Osmolar Contrast                         | B20F0ZZ     |
| Plain Radiography of Other Bypass Graft using Low Osmolar Contrast                          | B20F1ZZ     |
| Plain Radiography of Other Bypass Graft using Other Contrast                                | B20FYZZ     |
| Fluoroscopy of Single Coronary Artery using High Osmolar Contrast, Laser Intraoperative     | B210010     |
| Fluoroscopy of Single Coronary Artery using High Osmolar Contrast                           | B2100ZZ     |
| Fluoroscopy of Single Coronary Artery using Low Osmolar Contrast, Laser Intraoperative      | B210110     |
| Fluoroscopy of Single Coronary Artery using Low Osmolar Contrast                            | B2101ZZ     |
| Fluoroscopy of Single Coronary Artery using Other Contrast, Laser Intraoperative            | B210Y10     |
| Fluoroscopy of Single Coronary Artery using Other Contrast                                  | B210YZZ     |
| Fluoroscopy of Multiple Coronary Arteries using High Osmolar Contrast, Laser Intraoperative | B211010     |
| Fluoroscopy of Multiple Coronary Arteries using High Osmolar Contrast                       | B2110ZZ     |
| Fluoroscopy of Multiple Coronary Arteries using Low Osmolar Contrast, Laser Intraoperative  | B211110     |
| Fluoroscopy of Multiple Coronary Arteries using Low Osmolar Contrast                        | B2111ZZ     |
| Fluoroscopy of Multiple Coronary Arteries using Other Contrast, Laser Intraoperative        | B211Y10     |
| Fluoroscopy of Multiple Coronary Arteries using Other Contrast                              | B211YZZ     |
| Fluoroscopy of Single Coronary Artery Bypass Graft using High Osmolar Contrast              | B2120ZZ     |

| <b>Element and Code Description</b>                                                                     | <b>Code</b> |
|---------------------------------------------------------------------------------------------------------|-------------|
| Fluoroscopy of Single Coronary Artery Bypass Graft using Low Osmolar Contrast, Laser Intraoperative     | B212110     |
| Fluoroscopy of Single Coronary Artery Bypass Graft using Low Osmolar Contrast                           | B2121ZZ     |
| Fluoroscopy of Single Coronary Artery Bypass Graft using Other Contrast, Laser Intraoperative           | B212Y10     |
| Fluoroscopy of Single Coronary Artery Bypass Graft using Other Contrast                                 | B212YZZ     |
| Fluoroscopy of Multiple Coronary Artery Bypass Grafts using High Osmolar Contrast, Laser Intraoperative | B213010     |
| Fluoroscopy of Multiple Coronary Artery Bypass Grafts using High Osmolar Contrast                       | B2130ZZ     |
| Fluoroscopy of Multiple Coronary Artery Bypass Grafts using Low Osmolar Contrast, Laser Intraoperative  | B213110     |
| Fluoroscopy of Multiple Coronary Artery Bypass Grafts using Low Osmolar Contrast                        | B2131ZZ     |
| Fluoroscopy of Multiple Coronary Artery Bypass Grafts using Other Contrast, Laser Intraoperative        | B213Y10     |
| Fluoroscopy of Multiple Coronary Artery Bypass Grafts using Other Contrast                              | B213YZZ     |
| Fluoroscopy of Right Internal Mammary Bypass Graft Using High Osmolar Contrast                          | B2170ZZ     |
| Fluoroscopy of Right Internal Mammary Bypass Graft Using Low Osmolar Contrast                           | B2171ZZ     |
| Fluoroscopy of Right Internal Mammary Bypass Graft Using Other Contrast                                 | B217YZZ     |
| Fluoroscopy of Left Internal Mammary Bypass Graft Using High Osmolar Contrast                           | B2180ZZ     |
| Fluoroscopy of Left Internal Mammary Bypass Graft Using Low Osmolar Contrast                            | B2181ZZ     |
| Fluoroscopy of Left Internal Mammary Bypass Graft Using Other Contrast                                  | B218YZZ     |
| Fluoroscopy of Other Bypass Graft using High Osmolar Contrast                                           | B21F0ZZ     |
| Fluoroscopy of Other Bypass Graft using Low Osmolar Contrast                                            | B21F1ZZ     |
| Fluoroscopy of Other Bypass Graft using Other Contrast                                                  | B21FYZZ     |
| <hr/>                                                                                                   |             |
| <b>Endomyocardial Biopsy Procedures</b>                                                                 |             |
| Excision of Right Ventricle, Open Approach, Diagnostic                                                  | 02BK0ZX     |
| Excision of Right Ventricle, Percutaneous Approach, Diagnostic                                          | 02BK3ZX     |
| Excision of Right Ventricle, Perc Endo Approach, Diagnostic                                             | 02BK4ZX     |
| Excision of Ventricular Septum, Open Approach, Diagnostic                                               | 02BM0ZX     |
| Excision of Ventricular Septum, Percutaneous Approach, Diagnostic                                       | 02BM3ZX     |
| Excision of Ventricular Septum, Perc Endo Approach, Diagnostic                                          | 02BM4ZX     |
